# Supplementary material for: Macrophage Migration Inhibitory Factor protects cancer cells from immunogenic cell death and impairs anti-tumor immune responses
Source: PubMed Central journal article supplement (PMC5986154; doi:10.1371/journal.pone.0197702), 2018-06-04

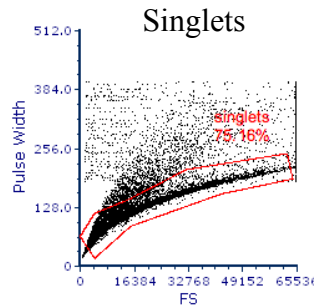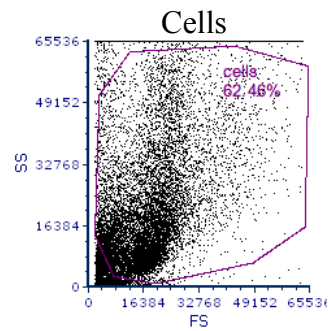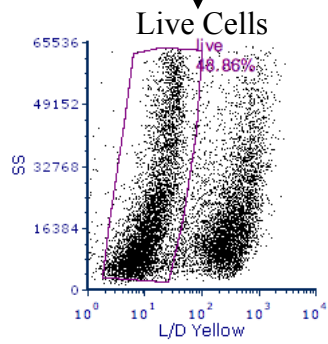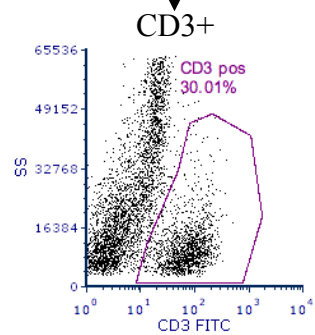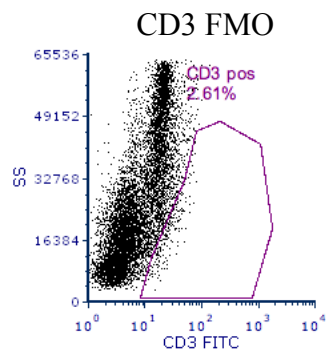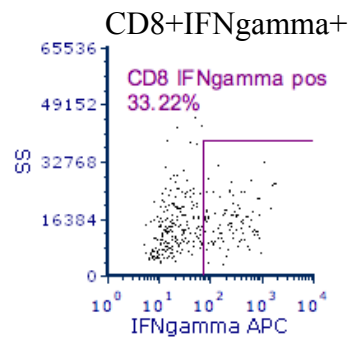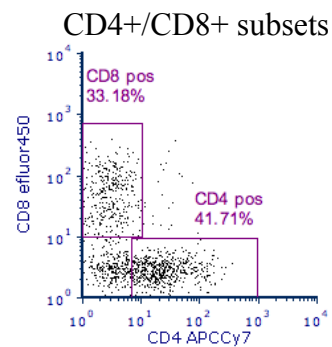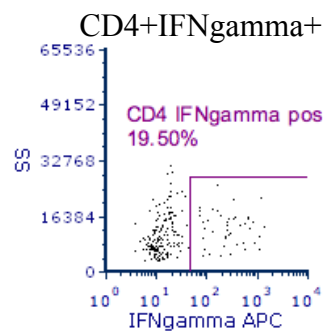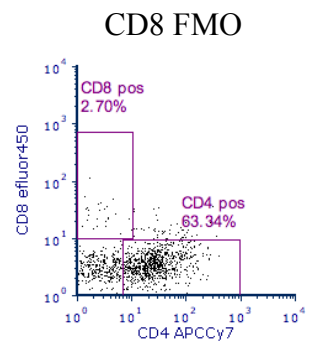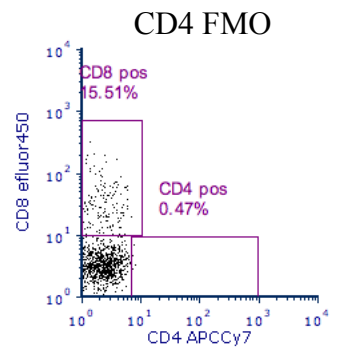

Supplement: pone.0197702.s004.pdf [file pone.0197702.s004.pdf]
